# Supplementary material for: Can Trustworthiness in a Supply Chain Be Signaled?
Source: Atypon-hosted journal article supplement (doi:10.1287/mnsc.2017.2817), 2017-09-13
Supplement: mnsc.2017.2817-sm-data.zip [file e_sample sizes_data exclusions_manipulations_measures.pdf › Data Disclosure Materials/e_sample sizes_data exclusions_manipulations_measures.pdf]

**Document describing how sample sizes were determined, all data exclusions (if any), all manipulations, and all measures collected**

We collected data for five different treatments: (1) main, (2) random, (3) low benefit, (4) high benefit, (5) repeated interactions. The sample sizes for each treatment were as follows: main = 134, random = 54, low benefit = 56, high benefit = 46, repeated = 50. The sample sizes were chosen so that we would have a higher number of observation of the main treatment (where most of the analysis was conducted) and large enough samples of the additional treatments. Since subjects do not change roles in the experiment, and there are two roles, the current sample sizes guarantee at least 23 observations per role (and, in general, at least 25 observations). All sample sizes were determined before running the experiment.

We conducted two pilot sessions to test the instructions and the software and to get an estimate of how long the sessions would last. We did not include the data from these two pilot studies in the paper since we made minor changes based on what we observed in the pilots. This is mentioned in footnote 15 in the paper.

The data collected in the main, random, and low benefit treatments is included in the file [Treatments123.dta](#). The data collected for the high benefit treatment is included in the file [Treatment4.dta](#). The data collected for the repeated interactions treatment is included in the file [Treatment5.dta](#).

We also collected demographics data for the main and random treatments (file: [demographics Main and Random.dta](#)) and the repeated interactions treatment (file: [demographics Repeated.dta](#)). Note that the demographics data is slightly incomplete: in the main and random treatments, the demographics data corresponds to 9 out of the 13 total sessions that were conducted and included in the analysis, and in the repeated treatment the demographics data corresponds to 4 out of the 5 sessions that were conducted and used in the analysis. All this is reported in footnote 15 in the paper.

All manipulations and data collected are reported in the paper.
